# Supplementary material for: Non-thermal plasma treatment improves chicken sperm motility via the regulation of demethylation levels
Source: PubMed Central journal article supplement (PMC5953930; doi:10.1038/s41598-018-26049-5), 2018-05-15
Supplement: 41598_2018_26049_MOESM1_ESM.pdf [file 41598_2018_26049_MOESM1_ESM.pdf]

## Supplementary Information

### Non-thermal plasma treatment improves chicken sperm motility via the regulation of demethylation levels

Jiao Jiao Zhang<sup>1</sup>, Huynh Luong Do<sup>1</sup>, Nisansala Chandimali<sup>1</sup>, Sang Baek Lee<sup>2</sup>, Young Sun Mok<sup>2</sup>,  
Nameun Kim<sup>1</sup>, Seong Bong Kim<sup>3</sup>, Taeho Kwon<sup>4,\*</sup>, Dong Kee Jeong<sup>1,4,\*</sup>

<sup>1</sup> Laboratory of Animal Genetic Engineering and Stem Cell Biology, Department of Advanced Convergence Technology and Science, Jeju National University, Jeju 63243, Republic of Korea

<sup>2</sup> Department of Chemical and Biological Engineering, Jeju National University, Jeju 63243, Republic of Korea

<sup>3</sup> Plasma Technology Research Center, National Fusion Research Institute, Gunsan-si, Jeollabuk-Do 54004, Republic of Korea

<sup>4</sup> Laboratory of Animal Genetic Engineering and Stem Cell Biology, Subtropical/Tropical Organism Gene Bank, Jeju National University, Jeju 63243, Republic of Korea

\*Correspondence and requests for materials should be addressed to D.K.J. (E-mail: ngejeong@gmail.com) and T.K. (E-mail: taehokwonk@gmail.com)

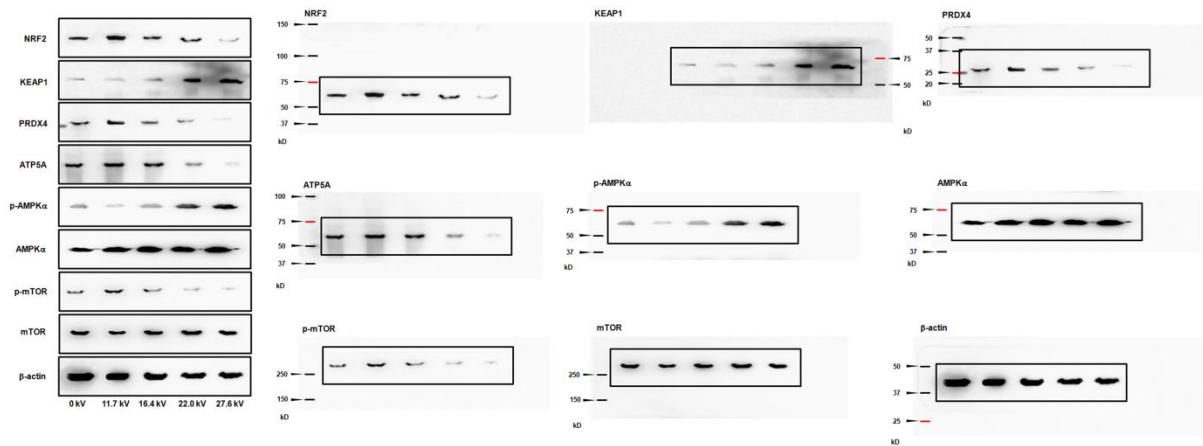

**Supplementary Figure S1.** Western blot analysis of the protein levels of NRF2, KEAP1, PRDX4, ATP5A, p-AMPK $\alpha$ , AMPK $\alpha$ , p-mTOR, and mTOR in chicken spermatozoa exposed to different potentials for 20 s.

Uncropped immunoblot scans for Figure 3f. The grouping of gels/blots cropped from different gels.

All blots were visualized with 5 min exposure time.

**Supplementary Table S1.** Effect of plasma exposure for different durations on ROS and antioxidant enzyme in chicken spermatozoa

| Exposure duration (s) | ROS (nmole DCF/10 <sup>9</sup> spz) | MDA (nmole/10 <sup>9</sup> spz) | SOD (U/10 <sup>9</sup> spz) | CAT (U/10 <sup>9</sup> spz) | GPx (mU/10 <sup>9</sup> spz) |
|-----------------------|-------------------------------------|---------------------------------|-----------------------------|-----------------------------|------------------------------|
| 0                     | 6.47±0.18                           | 3.04±0.18                       | 42.53±0.91                  | 2.16±0.11                   | 4.34±0.10                    |
| 10                    | 6.07±0.04*                          | 2.66±0.17                       | 67.48±2.61**                | 2.85±0.17**                 | 5.86±0.16**                  |
| 20                    | 5.79±0.18*                          | 2.04±0.17**                     | 72.64±3.17**                | 3.45±0.23**                 | 6.15±0.31**                  |
| 40                    | 6.20±0.10                           | 2.76±0.18                       | 58.42±2.35**                | 2.64±0.14**                 | 5.44±0.25**                  |
| 60                    | 7.61±0.19**                         | 3.35±0.27                       | 40.37±2.29                  | 1.85±0.07                   | 4.13±0.10                    |
| 80                    | 8.65±0.08**                         | 3.85±0.18**                     | 33.58±0.80**                | 1.65±0.10**                 | 3.54±0.17**                  |

Plasma exposure intensity was 11.7 kV. Values are expressed as the mean ± standard error (n=10) of three replicates; n represents an individual cock. Within a column: \*,  $p < 0.05$  versus control; \*\*,  $p < 0.01$  versus control, according to one-way ANOVA and LSD test.

**Supplementary Table S2.** Effect of plasma exposure for different durations on ATP and activity of mitochondria respiratory enzyme in chicken spermatozoa

| Exposure duration (s) | ATP (nmole/10 <sup>9</sup> spz) | NADH (U/10 <sup>9</sup> spz) | Cytochrome c oxidase (mU/10 <sup>9</sup> spz) | ATP synthase (mU/10 <sup>9</sup> spz) |
|-----------------------|---------------------------------|------------------------------|-----------------------------------------------|---------------------------------------|
| 0                     | 3.62±0.15                       | 0.57±0.02                    | 34.55±0.93                                    | 21.53±0.93                            |
| 10                    | 4.85±0.10**                     | 0.68±0.04**                  | 46.74±1.66**                                  | 27.47±1.80**                          |
| 20                    | 5.84±0.40**                     | 0.79±0.02**                  | 56.40±3.16**                                  | 31.30±2.38**                          |
| 40                    | 4.64±0.16**                     | 0.71±0.02**                  | 49.46±2.44**                                  | 28.46±1.75**                          |
| 60                    | 3.26±0.10                       | 0.50±0.05*                   | 30.40±1.52                                    | 19.32±0.80                            |
| 80                    | 2.74±0.10**                     | 0.42±0.01**                  | 24.48±1.69**                                  | 16.37±1.80**                          |

Plasma exposure intensity was 11.7 kV. Values are expressed as the mean ± standard error (n=10) of three replicates; n represents an individual cock. Within a column: \*,  $p < 0.05$  versus control; \*\*,  $p < 0.01$  versus control, according to one-way ANOVA and LSD test.

**Supplementary Table S3.** Primer sequences for the RT-PCR

| Gene           | Sequence number | Sequence position | Product Annealing |                  |                                                        |
|----------------|-----------------|-------------------|-------------------|------------------|--------------------------------------------------------|
|                |                 |                   | length (bp)       | Temperature (°C) | Sequence (5'to3')                                      |
| <i>β-actin</i> | NM_205518.1     | 625-818           | 194               | 57               | F: GTGCGTGACATCAAGGAGAAGC<br>R: CCACAGGACTCCATACCCAAGA |
| <i>NOX4</i>    | NM_001101829.1  | 28-157            | 130               | 57               | F: CGAGGATCTCAGAAGGTTGC<br>R: GAGCATTACCAGATGAGCA      |
| <i>NRF2</i>    | NM_205117.1     | 484-619           | 136               | 57               | F: AAAACGCTGAACCACCAATC<br>R: GCTGGAGAAGCCTCATTGTC     |
| <i>KEAP1</i>   | KU321503.1      | 1227-1485         | 259               | 57               | F: GTATCACAGCAGCGTGGAGA<br>R: GCGTAGATGCAGTTGTTGA      |
| <i>SOD</i>     | NM_205064.1     | 106-278           | 173               | 55               | F: ATTACCGGCTTGTCTGATGG<br>R: CCTCCCTTGCAGTCACATT      |
| <i>CAT</i>     | NM_001031215.2  | 1067-1276         | 210               | 55               | F: CTCATTCCAGTGGGCAAGAT<br>R: GTAGGGGCAATTCACAGGAA     |
| <i>GPx</i>     | NM_001277853.2  | 353-474           | 122               | 55               | F: ATGTTTCGAGAAGTGCAGGT<br>R: ATGATGTACTGCGGGTTGGT     |
| <i>PRDX1</i>   | NM_001271932.1  | 358-545           | 188               | 56               | F: ACAAGGTGGTTTGGGCACTA<br>R: TCTCATCAACAGAACGGCCA     |
| <i>PRDX3</i>   | XM_426543.5     | 414-551           | 138               | 56               | F: TTTCACCTTTGTGTGCCCA<br>R: TTGCGCGGGGTATTTATCCA      |
| <i>PRDX4</i>   | XM_001233999.3  | 595-733           | 139               | 56               | F: TGCACTTAGGGGCTTTTCA<br>R: TTCTCCATGCTTGTCCGTGT      |
| <i>PRDX6</i>   | NM_001039329.2  | 189-340           | 152               | 58               | F: TGAGTTCAGCAAACGCAACG<br>R: GCTCTCGGTCCCTATCAGCG     |
| <i>ATP5A1</i>  | NM_204286.1     | 1207-1364         | 158               | 57               | F: GGTATCCGTCCAGCCATCAA<br>R: GCATCCAAATCAGACCCAAACT   |
| <i>ATP5B</i>   | NM_001031391.2  | 482-637           | 156               | 57               | F: GCCCATCACAACGAAACAG<br>R: CGCCTCCAAACAAACCAATC      |
| <i>ATP5C1</i>  | NM_001278096.1  | 272-411           | 140               | 57               | F: ATTAAGGCACCCGAGGACAA<br>R: ACTTCCTTCCCTGCATTGGA     |
| <i>ATP5F1</i>  | XM_417993.4     | 437-644           | 208               | 57               | F: CATTGGAGACTGCCATTGAGG<br>R: TGATCTTGCTCTTTCTGACGCTT |
| <i>ATP5G1</i>  | XM_001233602.3  | 287-536           | 250               | 57               | F: CAGGAGCAGGTATTGGGACA<br>R: TTGTCAGTCTGGAACGCTCT     |
| <i>ATP5G3</i>  | NM_001277855.1  | 141-288           | 148               | 57               | F: CAAAACGCTGTCTCCCAAC<br>R: ACCGAAGACCGTTCCAATACC     |
| <i>ATP5H</i>   | XM_001232598.3  | 332-551           | 220               | 57               | F: CTGAAGGTCCCTGAACCAGT<br>R: ACTTCTCCCTGTCCAGTCTG     |
| <i>ATP5I</i>   | NM_001097534.2  | 74-240            | 167               | 57               | F: TCTCGCCCCTCATCAAGTTC<br>R: TGCCAGTTCCTTTGCAATCC     |

|                                 |                |         |     |    |                                                        |
|---------------------------------|----------------|---------|-----|----|--------------------------------------------------------|
| <i>ATP5J</i>                    | XM_004938370.1 | 58-197  | 140 | 58 | F: CACTTGCGGAGAAACATCGGT<br>R: CCTACATCAACAGGTCCTCCAGC |
| <i>ATP5J2</i>                   | NM_001257200.1 | 170-263 | 94  | 57 | F: GCCTCGGTGGTATCAGTATGGT<br>R: TACTTCCTGCGGCGGTCAT    |
| <i>ATP5L</i>                    | XM_015298211   | 250-377 | 128 | 57 | F: CCATGGTCAGGAGCTTTCAG<br>R: GCCTCGTTTGCCTATGATCTC    |
| <i>ATP5S</i>                    | NM_001277562.1 | 46-279  | 234 | 57 | F: TCCCCTTCCCCTTTCTTTCC<br>R: CATAGCCTTGATAGCGCACC     |
| <i>AMPK<math>\alpha</math>2</i> | NM_001039605.1 | 726-943 | 218 | 57 | F: GGAGGCGTGTTTTACATCCC<br>R: AACTTCTCACAGACCTCCCG     |
| <i>AMPK<math>\beta</math>2</i>  | NM_001044662.1 | 435-661 | 227 | 57 | F: CCAGTGTTTTTCAGCTCCCAC<br>R: GAGGTCCAGGATAGCGACAA    |
| <i>AMPK<math>\gamma</math>3</i> | NM_001031258.2 | 183-320 | 138 | 57 | F: GCTGGAACCCGACAACAATT<br>R: GCCTTCTTGATCTCCAGGGT     |
| <i>mTOR</i>                     | XM_417614.4    | 119-309 | 191 | 57 | F: TGAAGGGGTCAAGGCAATCC<br>R: GGCGAGCAGTGGTTGTGGAT     |

---

**Supplementary Table S4.** Primer sequences for bisulfite-sequencing PCR

| Gene                            | Sequence position | Product length (bp) | Annealing        |                                                                  | Expected No. of CpGs |
|---------------------------------|-------------------|---------------------|------------------|------------------------------------------------------------------|----------------------|
|                                 |                   |                     | Temperature (°C) | Sequence (5'to3')                                                |                      |
| <i>NRF2</i>                     | 407-562           | 156                 | 55               | F: TTTGTTGGTTTAGTTGGTGTAGAT<br>R: CAATCATCAAAAAACAAAACCTCTT      | 4                    |
| <i>KEAP1</i>                    | 583-849           | 267                 | 55               | F: AATTTGTTTTATTGTTAGTTGGTTA<br>R: CAAAATAAAATCCTAAAAAATCTAC     | 30                   |
| <i>PRDX4</i>                    | 70-343            | 274                 | 56               | F: GTTGTTGTTGGTTTTGTTGTTGTA<br>R: AAAAACAAAATATTTTCCTTCATAATCTAT | 24                   |
| <i>ATP5A1</i>                   | 1082-1292         | 211                 | 55               | F: GAGGTTTTTTGATTGTTTTGTTTGT<br>R: CCTACCACCTATTCATTACCCTAAT     | 4                    |
| <i>AMPK<math>\alpha</math>2</i> | 233-463           | 231                 | 52               | F: AGAAATTTAAAATTTGAAATTTTTT<br>R: AAATCCCTATAAACAACCATATATC     | 10                   |
| <i>mTOR</i>                     | 1690-1890         | 201                 | 52               | F: ATATTTAGGATGGGTTGTTGAAAAT<br>R: AAATCAAAAAATACCCTTCAAACCTC    | 4                    |
